# Supplementary material for: Machine learning-based identification of tumor-infiltrating immune cell-associated model with appealing implications in improving prognosis and immunotherapy response in bladder cancer patients
Source: Front Immunol. 2023 Mar 31;14:1171420. doi: 10.3389/fimmu.2023.1171420 (PMC10102422; doi:10.3389/fimmu.2023.1171420)
Supplement: Supplementary file 5 [file Table_4.xlsx]

## Sheet: unicox
Table S4 26 prognosis-related mRNAs identified from the hub genes within the yellow module
Gene	HR (95% CI)	P-value
CTLA4	0.84(0.76-0.92)	<0.001
CEACAM21	0.84(0.77-0.93)	<0.001
SPHK1	1.14(1.06-1.24)	<0.001
HLA-F	0.78(0.68-0.9)	<0.001
LRRC15	1.21(1.08-1.35)	0.00103385
TBX1	0.92(0.87-0.97)	0.00186286
LOX	1.23(1.08-1.41)	0.00248384
TNC	1.15(1.05-1.26)	0.0025443
TNFAIP6	1.15(1.05-1.26)	0.00319806
HSD17B2	0.92(0.87-0.97)	0.00397506
RGS2	1.17(1.05-1.29)	0.0044238
FOXD1	1.1(1.03-1.17)	0.00467642
VIM	1.17(1.04-1.31)	0.00686004
EFEMP1	1.33(1.08-1.64)	0.00767676
EREG	1.07(1.02-1.12)	0.00892886
GAS1	1.15(1.03-1.27)	0.0130707
OSMR	1.11(1.02-1.2)	0.0142389
FPR1	1.09(1.02-1.18)	0.0147153
CSF2RA	1.15(1.02-1.29)	0.0171491
FOSL1	1.11(1.02-1.21)	0.0197474
IL10	1.14(1.02-1.27)	0.0197549
IRF1	0.9(0.82-0.99)	0.0337288
TLR6	1.11(1.01-1.22)	0.0339734
FCGR2A	1.09(1.01-1.18)	0.0372414
SIRPG	0.92(0.85-1)	0.0398644
HPSE	1.1(1-1.2)	0.0400394
