# Supplementary material for: Machine learning-based identification of tumor-infiltrating immune cell-associated model with appealing implications in improving prognosis and immunotherapy response in bladder cancer patients
Source: Front Immunol. 2023 Mar 31;14:1171420. doi: 10.3389/fimmu.2023.1171420 (PMC10102422; doi:10.3389/fimmu.2023.1171420)
Supplement: Supplementary file 6 [file Table_5.xlsx]

## Sheet: Cindex_modified
Table S5 C-index of each model across all datasets
Model	TCGA	GSE32548	GSE32894	GSE13507	GSE31684	GSE48075	GSE48277	GSE69795	GSE70691
StepCox[backward] + RSF	0.923	0.743	0.768	0.643	0.703	0.667	0.685	0.644	0.654
StepCox[backward] + Enet[alpha=0.6]	0.719	0.733	0.769	0.634	0.634	0.633	0.66	0.594	0.615
StepCox[backward] + Enet[alpha=0.9]	0.719	0.732	0.768	0.667	0.634	0.634	0.649	0.587	0.599
StepCox[backward] + Enet[alpha=0.8]	0.719	0.733	0.768	0.634	0.632	0.634	0.657	0.594	0.608
StepCox[backward] + Enet[alpha=1]	0.719	0.733	0.768	0.635	0.634	0.634	0.644	0.589	0.607
RSF + SuperPC	0.609	0.736	0.753	0.62	0.633	0.612	0.644	0.594	0.625
StepCox[both] + Enet[alpha=0]	0.725	0.715	0.768	0.634	0.634	0.644	0.647	0.575	0.595
StepCox[forward]	0.742	0.692	0.768	0.634	0.634	0.649	0.667	0.572	0.594
StepCox[both] + Enet[alpha=0.2]	0.728	0.713	0.768	0.634	0.634	0.644	0.645	0.572	0.594
StepCox[backward] + Enet[alpha=0.3]	0.719	0.716	0.768	0.634	0.634	0.631	0.648	0.577	0.595
StepCox[both] + plsRcox	0.729	0.711	0.767	0.634	0.634	0.65	0.644	0.567	0.591
StepCox[both] + Enet[alpha=0.1]	0.727	0.717	0.747	0.632	0.634	0.644	0.639	0.584	0.595
Enet[alpha=0]	0.68	0.716	0.747	0.634	0.635	0.66	0.634	0.575	0.594
StepCox[backward] + plsRcox	0.719	0.719	0.747	0.632	0.635	0.636	0.64	0.584	0.596
StepCox[backward] + Enet[alpha=0.1]	0.719	0.732	0.758	0.634	0.604	0.631	0.643	0.589	0.599
StepCox[backward] + Enet[alpha=0.7]	0.719	0.733	0.75	0.631	0.605	0.634	0.646	0.589	0.599
StepCox[backward] + Enet[alpha=0.5]	0.719	0.732	0.748	0.631	0.62	0.633	0.641	0.584	0.597
StepCox[backward] + Enet[alpha=0.2]	0.719	0.733	0.75	0.632	0.608	0.631	0.643	0.589	0.599
StepCox[backward] + Enet[alpha=0.4]	0.719	0.718	0.75	0.632	0.616	0.631	0.648	0.584	0.596
RSF	0.932	0.719	0.767	0.634	0.632	0.611	0.654	0.57	0.593
StepCox + CoxBoost	0.725	0.731	0.75	0.623	0.605	0.64	0.64	0.584	0.596
StepCox[both] + Enet[alpha=0.8]	0.728	0.721	0.752	0.635	0.667	0.648	0.648	0.565	0.587
StepCox[backward] + Enet[alpha=0]	0.717	0.73	0.767	0.633	0.634	0.629	0.65	0.575	0.594
StepCox[both] + Enet[alpha=0.9]	0.728	0.727	0.747	0.632	0.634	0.648	0.648	0.565	0.584
StepCox[both] + Enet[alpha=1]	0.728	0.731	0.765	0.634	0.604	0.648	0.65	0.565	0.59
StepCox[both] + Enet[alpha=0.5]	0.728	0.728	0.758	0.632	0.604	0.648	0.649	0.565	0.59
StepCox[both] + Enet[alpha=0.4]	0.728	0.723	0.649	0.631	0.639	0.647	0.648	0.556	0.583
StepCox[both] + Enet[alpha=0.6]	0.728	0.719	0.646	0.632	0.645	0.648	0.648	0.548	0.583
RSF + Enet[alpha=0.2]	0.626	0.661	0.745	0.617	0.638	0.579	0.646	0.532	0.567
RSF + CoxBoost	0.626	0.655	0.747	0.616	0.632	0.578	0.633	0.532	0.565
RSF + Enet[alpha=0.3]	0.626	0.655	0.744	0.616	0.617	0.578	0.634	0.532	0.566
StepCox[backward] + GBM	0.786	0.688	0.644	0.603	0.602	0.657	0.636	0.534	0.57
RSF + Enet[alpha=0]	0.627	0.648	0.737	0.616	0.616	0.592	0.633	0.529	0.563
GBM	0.783	0.661	0.643	0.639	0.62	0.625	0.634	0.532	0.568
StepCox[both] + Enet[alpha=0.7]	0.729	0.719	0.643	0.632	0.603	0.648	0.639	0.546	0.577
StepCox[backward] + survival-SVM	0.513	0.703	0.608	0.591	0.631	0.609	0.638	0.546	0.577
StepCox[backward] + SuperPC	0.618	0.719	0.644	0.602	0.604	0.618	0.643	0.567	0.591
StepCox[both] + Enet[alpha=0.3]	0.727	0.719	0.645	0.631	0.604	0.646	0.636	0.536	0.571
RSF + Enet[alpha=0.1]	0.626	0.673	0.643	0.619	0.622	0.581	0.635	0.532	0.57
Lasso + RSF	0.915	0.655	0.673	0.589	0.616	0.596	0.634	0.532	0.566
Enet[alpha=1]	0.67	0.655	0.642	0.568	0.619	0.638	0.634	0.532	0.566
StepCox[both] + SuperPC	0.615	0.621	0.673	0.63	0.613	0.649	0.624	0.529	0.52
RSF + Enet[alpha=0.5]	0.625	0.629	0.657	0.615	0.615	0.577	0.631	0.584	0.537
RSF + Enet[alpha=0.4]	0.625	0.652	0.66	0.615	0.616	0.577	0.633	0.532	0.563
RSF + Enet[alpha=0.7]	0.626	0.626	0.658	0.615	0.615	0.576	0.631	0.569	0.532
Enet[alpha=0.9]	0.67	0.622	0.648	0.565	0.615	0.639	0.629	0.56	0.521
RSF + Enet[alpha=0.6]	0.625	0.624	0.642	0.615	0.615	0.575	0.631	0.562	0.522
RSF + Enet[alpha=0.8]	0.625	0.622	0.642	0.615	0.615	0.576	0.631	0.562	0.521
RSF + Enet[alpha=0.9]	0.625	0.621	0.641	0.613	0.613	0.576	0.626	0.562	0.521
RSF + Enet[alpha=1]	0.625	0.621	0.641	0.613	0.613	0.576	0.625	0.562	0.52
StepCox[both] + GBM	0.798	0.619	0.568	0.613	0.605	0.645	0.612	0.562	0.518
CoxBoost + RSF	0.916	0.621	0.6	0.591	0.613	0.604	0.621	0.56	0.52
Enet[alpha=0.8]	0.67	0.62	0.588	0.563	0.61	0.639	0.621	0.56	0.52
CoxBoost + Enet[alpha=0]	0.679	0.606	0.547	0.62	0.631	0.614	0.603	0.572	0.514
Enet[alpha=0.4]	0.668	0.609	0.547	0.55	0.632	0.646	0.604	0.593	0.514
CoxBoost + GBM	0.779	0.61	0.547	0.583	0.63	0.602	0.604	0.598	0.514
Enet[alpha=0.2]	0.667	0.618	0.568	0.599	0.632	0.643	0.609	0.508	0.515
Lasso + SuperPC	0.628	0.619	0.568	0.645	0.632	0.579	0.611	0.512	0.518
StepCox[both] + RSF	0.927	0.6	0.544	0.613	0.623	0.624	0.602	0.562	0.513
Enet[alpha=0.7]	0.669	0.62	0.577	0.561	0.632	0.64	0.615	0.52	0.519
Enet[alpha=0.3]	0.67	0.62	0.571	0.598	0.605	0.634	0.614	0.517	0.519
CoxBoost + Enet[alpha=0.1]	0.68	0.612	0.566	0.61	0.632	0.615	0.607	0.505	0.514
RSF + StepCox[both]	0.626	0.62	0.585	0.523	0.631	0.621	0.618	0.527	0.519
RSF + StepCox[backward]	0.626	0.62	0.579	0.523	0.631	0.621	0.616	0.524	0.519
CoxBoost + SuperPC	0.628	0.584	0.529	0.638	0.594	0.626	0.598	0.529	0.508
Enet[alpha=0.6]	0.669	0.603	0.544	0.559	0.603	0.643	0.603	0.529	0.514
CoxBoost	0.673	0.608	0.547	0.557	0.603	0.633	0.603	0.529	0.514
CoxBoost + Enet[alpha=0.2]	0.681	0.594	0.537	0.608	0.598	0.607	0.602	0.529	0.511
Enet[alpha=0.5]	0.669	0.597	0.544	0.555	0.601	0.643	0.602	0.529	0.512
StepCox[both] + survival-SVM	0.537	0.595	0.541	0.587	0.599	0.572	0.602	0.562	0.511
CoxBoost + Enet[alpha=0.3]	0.681	0.593	0.531	0.605	0.598	0.603	0.601	0.529	0.509
Lasso + GBM	0.779	0.596	0.543	0.587	0.599	0.595	0.602	0.529	0.512
CoxBoost + Enet[alpha=0.4]	0.681	0.574	0.52	0.604	0.591	0.603	0.596	0.557	0.504
Enet[alpha=0.1]	0.667	0.586	0.53	0.547	0.596	0.654	0.598	0.529	0.508
RSF + GBM	0.741	0.577	0.527	0.622	0.593	0.588	0.596	0.527	0.507
StepCox[both]	0.728	0.601	0.544	0.508	0.602	0.65	0.602	0.515	0.513
CoxBoost + Enet[alpha=0.5]	0.681	0.573	0.513	0.605	0.589	0.604	0.596	0.555	0.49
RSF + plsRcox	0.633	0.574	0.516	0.579	0.591	0.596	0.596	0.557	0.496
Lasso + survival-SVM	0.586	0.57	0.508	0.599	0.583	0.636	0.592	0.538	0.477
Lasso + CoxBoost	0.681	0.571	0.512	0.604	0.587	0.602	0.595	0.548	0.479
CoxBoost + plsRcox	0.681	0.57	0.507	0.602	0.579	0.598	0.588	0.531	0.476
CoxBoost + Enet[alpha=0.9]	0.681	0.569	0.507	0.604	0.579	0.602	0.584	0.529	0.474
CoxBoost + Enet[alpha=0.6]	0.681	0.569	0.505	0.605	0.567	0.602	0.579	0.524	0.474
StepCox[backward]	0.719	0.57	0.509	0.507	0.587	0.635	0.595	0.545	0.477
plsRcox	0.742	0.568	0.504	0.616	0.567	0.616	0.578	0.505	0.471
survival-SVM	0.623	0.569	0.505	0.593	0.568	0.595	0.581	0.529	0.474
CoxBoost + Enet[alpha=0.8]	0.681	0.568	0.505	0.604	0.567	0.602	0.579	0.51	0.474
CoxBoost + Enet[alpha=0.7]	0.681	0.567	0.504	0.605	0.567	0.602	0.578	0.483	0.47
SuperPC	0.626	0.567	0.503	0.598	0.565	0.584	0.577	0.481	0.468
Lasso + StepCox[both]	0.677	0.557	0.503	0.567	0.563	0.567	0.577	0.478	0.468
CoxBoost + survival-SVM	0.547	0.531	0.503	0.594	0.555	0.641	0.576	0.476	0.421
Lasso + StepCox[backward]	0.677	0.553	0.503	0.567	0.561	0.567	0.576	0.476	0.465
Lasso + plsRcox	0.681	0.52	0.502	0.601	0.55	0.598	0.575	0.476	0.42
CoxBoost + StepCox[both]	0.677	0.536	0.503	0.567	0.559	0.567	0.576	0.476	0.423
CoxBoost + Enet[alpha=1]	0.681	0.494	0.502	0.604	0.547	0.603	0.572	0.476	0.415
CoxBoost + StepCox[backward]	0.677	0.535	0.503	0.567	0.557	0.567	0.576	0.476	0.421
Lasso + StepCox[forward]	0.681	0.493	0.501	0.603	0.523	0.596	0.567	0.474	0.415
CoxBoost + StepCox[forward]	0.681	0.492	0.492	0.603	0.523	0.596	0.567	0.464	0.415
RSF + survival-SVM	0.556	0.498	0.494	0.596	0.507	0.615	0.567	0.395	0.413
RSF + StepCox[forward]	0.632	0.509	0.488	0.579	0.508	0.601	0.567	0.447	0.414
